# Supplementary material
Source: Research Square preprint supplement (doi:10.21203/rs.3.rs-9667972/v1)
Supplement: Supplementary file 1 [file 11ad40e14375bf3e2439ee0b.docx]

**Declaration of interests**
 
☐ The authors declare that they have no known competing financial interests or personal relationships that could have appeared to influence the work reported in this paper.
 
☒ The authors declare the following financial interests/personal relationships which may be considered as potential competing interests:

| 1. This study was supported by the Funding of Applied Basic Research Foundation of Yunnan Province (CN) (NO.202501AT070487) 2. This study was supported by the Joint Fund of Yunnan University of Traditional Chinese Medicine and the First Affiliated Hospital (NO.XYLH202009) 3. This study was supported by the Applied Basic Research Foundation of Yunnan Province (NO.XYLH202301AZO70001-144） 4. This study was Suppored by the Joint Found of Yunnan University of Traditional Chinese Medicine and the First Affiliated Hospital (NO.XYLH202215) 5. The drugs, or supplies was provided by China Food and Drug Inspection Institute (Beijing). 6. Equipment for drug validation was supported by the Experimental Research Center of Yunnan Provincial Hospital of Traditional Chinese Medicine 7. This study statistical analysis was provided by Wuhan China University. 8. Huang Churong reports a relationship with Yunnan College of Business Management that includes: non-financial support.   **CRediT authorship contribution statement**  Liu Xiaomin: Writing – original draft, review & editing, Methodology, Data curation, Conceptualization.  Huang Churong: Writing – original draft, Writing – review, Data curation.  Li Huanqing: Methodology, Data curation.  Bai Yali: Methodology、Data curation.  Tang Qin: Writing – review, Conceptualization, Supervision.  Lin Yun: Methodology, Conceptualization, Supervision.  Yin Zhiping: Supervision  If there are other authors, they declare that they have no known competing financial interests or personal relationships that could have appeared to influence the work reported in this paper. |
| --- |
